# Supplementary material
Source: publisher figshare collection journal article supplement (https://frontiersin.figshare.com/ndownloader/files/30750976)
Supplement: Supplementary file 1 [file 30750976]

## Sheet: Sheet1
time	real	VMD-AMS-TCN-5	MSC-SA-TCN-5	MMED-TCN-5
0	7.424	7.22055	6.92639	8.45389
1	6.358	6.60081	5.56182	6.74937
2	5.508	5.35454	4.00574	5.54906
3	4.096	5.74798	3.50661	4.36185
4	3.638	5.16944	4.0441	2.90908
5	5.044	4.40095	3.54229	5.64215
6	3.986	3.83897	4.20659	4.1771
7	4.817	3.70124	3.95739	4.45581
8	3.072	4.70864	3.99357	3.42195
9	2.414	3.96697	4.49185	3.45525
10	1.916	3.11523	2.48771	3.10707
11	3.323	4.70334	3.13215	3.26419
12	4.014	4.65408	4.62537	4.65082
13	5.708	6.07386	5.8031	5.20914
14	5.809	6.33621	5.48366	5.43729
15	5.71	6.76292	5.8014	6.3133
16	9.225	8.68299	6.33584	7.48042
17	7.458	9.22771	7.85311	7.45932
18	9.696	10.194	9.06207	9.04945
19	11.881	10.5183	10.6065	11.0562
20	13.391	10.2952	11.9434	12.8896
21	11.504	11.0684	10.9984	11.7492
22	10.751	11.7732	10.0157	10.0425
23	10.944	11.021	9.71227	9.907
24	10.041	11.1459	9.77532	9.59484
25	9.474	11.1409	8.8999	9.38033
26	11.31	13.6021	10.8271	11.7932
27	15.532	14.2261	13.0206	14.0409
28	14.526	16.0198	15.9008	16.3355
29	21.048	16.9179	19.1534	19.2999
30	22.64	21.6497	21.2197	22.9173
31	24.434	24.8609	24.0729	23.5706
32	26.38	26.9121	26.229	27.0289
33	29.471	29.1454	28.4089	28.5195
34	28.484	29.4361	30.5519	28.8934
35	28.571	28.7575	30.0303	29.7616
36	30.538	30.0955	31.3158	29.7844
37	30.604	31.5471	31.3175	31.4406
38	29.144	31.8391	31.857	30.266
39	28.588	32.3137	32.0186	28.8909
40	31.585	34.2398	31.1207	33.3682
41	34.641	37.2117	35.3715	34.1972
42	35.833	38.2731	38.6639	36.6682
43	38.561	40.6349	42.0078	39.6367
44	39.751	41.1391	45.0282	43.2105
45	42.845	41.9763	43.7348	45.0822
46	43.842	43.0616	44.1598	43.6474
47	42.117	44.1406	42.9977	41.7677
48	40.972	43.9583	42.8491	41.9333
49	42.911	43.9699	44.5442	43.2042
50	42.386	39.9879	42.178	44.0355
51	40.859	38.4063	40.4336	40.8123
52	36.732	37.721	36.4454	36.3435
53	33.006	35.5656	34.392	33.5412
54	32.393	35.2526	33.7006	32.6438
55	31.185	35.7706	30.2687	32.1577
56	35.631	37.9415	34.0522	35.1733
57	39.904	38.0686	37.2595	38.9451
58	41.561	41.0928	40.663	40.4094
59	43.912	40.6785	43.3436	43.1616
60	44.538	41.9458	41.9435	44.6569
61	44.139	43.3928	42.577	43.9991
62	44.572	44.7728	42.078	43.5323
63	43.689	45.9792	42.5515	43.9086
64	45.321	45.1737	44.8872	44.51
65	44.765	44.4107	43.2438	45.6657
66	45.098	44.7525	44.2692	44.1971
67	44.299	45.2695	43.4764	44.5705
68	45.527	45.2248	44.1125	45.2648
69	45.221	44.6621	46.0228	45.6521
70	45.284	44.3841	43.0557	45.8727
71	43.767	45.4791	43.8339	43.3652
72	44.148	45.5828	43.9118	44.0789
73	45.148	45.7867	45.0731	45.7378
74	44.941	45.4212	47.1444	46.4155
75	45.523	45.155	45.6457	47.01
76	44.614	46.0749	46.1285	44.8701
77	44.607	46.4377	45.2681	44.8187
78	44.171	46.6822	45.7696	46.1194
79	45.142	45.8261	47.2532	46.3137
80	42.281	43.4553	42.6636	44.38
81	43.347	44.2594	43.2237	43.0243
82	43.095	44.2981	42.6284	43.2121
83	43.029	44.4782	43.631	43.83
84	44.672	43.857	45.7035	45.5534
85	45.304	44.1053	43.7705	46.2735
86	44.878	44.7131	44.6263	44.5759
87	44.929	45.1783	44.0248	44.8916
88	42.766	45.4342	44.3718	43.5995
89	42.091	44.5602	44.7926	43.2522
90	40.397	42.4591	41.2831	42.1284
91	42.908	43.6304	42.9107	42.6971
92	43.521	43.7701	43.4113	44.4288
93	44.219	44.3457	44.4919	43.9469
94	41.615	43.8449	44.2518	43.4003
95	44.327	43.1509	42.8161	45.1077
96	44.632	44.5443	43.961	44.0052
97	44.602	44.8594	43.8297	44.0508
98	44.805	45.3963	44.6283	44.2707
99	44.075	44.9867	44.5981	44.148
100	45.294	44.0923	42.5292	46.0777
101	45.068	45.2522	43.6787	43.7934
102	43.766	45.596	43.8234	43.811
103	45.566	45.8544	44.9495	45.7557
104	44.531	45.242	46.408	46.5803
105	45.223	44.6627	44.3598	47.1542
106	45.174	45.4369	44.5553	45.5521
107	44.453	45.5747	43.5614	43.9657
108	44.763	45.1343	43.7032	44.9714
109	44.79	44.6748	44.0506	45.4889
110	44.176	43.0243	42.035	45.6723
111	44.153	43.7369	42.4339	43.9394
112	42.868	43.6018	41.6738	42.951
113	44.654	43.5044	42.3369	44.532
114	43.796	42.9375	43.4061	45.1104
115	43.953	42.5874	41.3818	44.678
116	41.725	43.4274	41.917	43.2971
117	44.799	43.651	41.4994	43.792
118	42.612	43.7836	42.0859	44.0331
119	44.174	42.9931	43.3563	44.7361
120	45.078	43.767	44.052	46.6621
121	45.427	44.5753	44.5187	45.3874
122	44.869	44.9127	43.4583	45.0846
123	43.271	44.9614	43.3293	44.3843
124	43.17	44.0802	43.2396	44.6449
125	44.264	43.6465	43.6861	45.2558
126	44.969	44.4955	44.3728	44.3574
127	44.991	44.6952	43.6507	44.9318
128	42.853	44.7687	43.9462	44.01
129	43.923	44.1322	43.7835	44.812
130	42.565	43.5792	43.1944	44.3349
131	44.722	44.695	44.3079	44.0025
132	45.345	44.9511	44.1728	45.4498
133	44.612	45.232	44.7597	44.3311
134	43.346	44.6098	44.0664	44.359
135	42.561	42.4768	41.5029	43.1944
136	43.826	43.6444	42.4668	42.8965
137	44.69	43.6826	42.6011	44.1482
138	43.858	44.0182	43.6623	43.8632
139	43.996	43.5301	44.6465	44.3147
140	45.124	43.994	43.5384	45.898
141	45.491	45.2202	44.5531	45.1933
142	45.649	45.6251	44.2839	45.5606
143	45.58	46.0189	45.0349	45.846
144	45.672	45.4537	46.2266	46.5352
145	45.833	44.5401	44.465	47.0299
146	44.355	45.3198	44.9689	44.8489
147	45.206	45.5874	44.3853	45.5249
148	44.593	45.4445	44.8296	45.476
149	44.096	44.8939	45.656	45.0672
150	45.202	44.2129	44.1854	46.0528
151	44.197	45.3362	44.8831	44.0291
152	43.718	45.3109	44.3894	44.1137
153	44.166	45.5348	45.2558	45.1042
154	45.731	44.9832	47.1056	46.0186
155	44.861	43.3018	43.8775	45.7278
156	43.706	43.9214	43.7519	42.584
157	41.729	43.8544	42.4239	41.7414
158	43.392	43.6674	42.8493	43.2427
159	44.002	42.9288	45.1781	44.6192
160	45.679	44.2683	44.6621	46.582
161	45.605	44.9646	45.509	44.8819
162	45.341	45.4744	45.0113	44.7187
163	44.143	45.5595	45.0746	43.5859
164	42.597	44.6443	44.7737	43.6719
165	42.545	42.2644	42.0937	43.3547
166	42.915	43.1782	42.9531	42.563
167	42.96	42.8712	42.8319	43.0398
168	42.576	42.9609	43.6716	42.7529
169	42.775	42.3333	44.327	43.3339
170	43.336	41.1541	42.4226	44.2394
171	41.878	40.7742	41.6421	41.6485
172	39.594	40.5667	39.2786	40.1684
173	37.671	39.4142	38.5069	37.5745
174	36.168	38.5285	38.4415	36.6705
175	39.586	39.3317	38.5615	41.3486
176	39.038	39.9716	40.0999	39.3532
177	41.037	40.2281	40.5879	40.8943
178	40.131	40.4938	41.1122	39.5869
179	36.812	39.4031	39.6483	38.4777
180	32.575	30.717	32.6102	33.3976
181	29.471	29.4909	29.5386	28.9169
182	25.613	27.7109	26.2051	25.6538
183	23.417	25.6922	25.5208	25.1554
184	27.827	25.2511	28.6994	26.9104
185	27.216	24.4084	27.2038	28.1602
186	24.719	23.0264	25.1248	23.8697
187	19.374	22.0038	21.0857	19.7812
188	18.622	21.0468	19.9974	18.9147
189	21.038	19.6318	23.0547	20.9696
190	22.382	21.0309	20.2223	22.5166
191	21.104	23.0855	21.8238	20.1994
192	21.383	23.5914	23.3227	21.2757
193	26.914	26.0532	26.0656	25.3451
194	27.9	25.3406	30.1983	28.5571
195	29.766	27.4146	28.2742	30.3347
196	29.358	29.1703	28.964	28.5588
197	27.771	30.4486	29.2508	27.8265
198	31.179	31.1838	30.3913	29.995
199	30.035	30.7442	32.2855	31.6455
200	32.298	28.1008	31.933	32.9987
201	29.596	26.9081	29.8543	29.4643
202	26.029	26.9328	26.4138	26.1225
203	23.187	23.977	24.2832	23.521
204	20.609	23.4981	21.9764	20.7726
205	20.002	22.2094	21.3216	21.3843
206	22.745	22.662	22.4429	22.9122
207	24.908	22.1088	22.9916	24.4634
208	21.882	21.6889	23.8528	22.2375
209	20.469	21.5976	21.7764	20.7773
210	21.443	18.7269	20.6878	22.36
211	20.506	18.8807	19.8524	20.2733
212	18.294	18.4049	18.3786	19.0488
213	17.778	17.9362	18.0413	17.4863
214	15.69	17.5772	17.3893	16.5121
215	15.403	15.5052	16.051	16.821
216	16.697	15.2641	15.907	16.1236
217	14.95	15.0809	14.9033	15.0822
218	14.602	15.0142	14.9133	14.2942
219	14.719	14.7141	15.6252	15.2472
220	14.368	12.4493	12.7409	15.3568
221	12.287	12.7636	12.5112	12.4519
222	10.796	12.4346	12.2204	11.3256
223	12.264	12.6204	13.0906	12.735
224	13.882	12.59	15.1761	15.1327
225	13.687	11.7804	12.9816	14.3638
226	11.493	11.8564	12.263	11.6737
227	12.451	11.9005	11.305	12.0581
228	11.373	11.775	11.3247	11.4486
229	11.112	11.3122	12.2502	10.9949
230	9.779	8.60881	9.35213	10.4455
231	7.823	8.86108	8.70768	8.05209
232	7.655	8.28757	8.29297	7.99294
233	8.374	7.93139	8.44189	7.44153
234	8.717	7.82276	8.84572	8.11573
235	8.237	6.74136	8.42558	9.03247
236	7.15	6.37155	7.15518	6.9969
237	5.723	5.96169	5.75459	5.69905
238	4.255	5.19362	5.03703	3.96198
239	4.199	4.88782	4.7392	3.82082
240	3.914	2.95996	4.0709	4.83474
241	3.252	2.90992	3.48087	3.7139
242	2.563	2.34713	2.72893	2.55561
243	2.835	2.10959	2.77719	2.28999
244	2.254	2.14787	2.69657	3.10772
245	2.408	0.508734	1.75785	2.83014
246	1.44	0.902723	1.17877	1.51679
247	0.913	0.640428	0.565062	0.44796
248	1.194	0.937498	0.789156	0.806652
249	1.02	1.16338	1.22028	1.14999
250	0.46	0.0195716	0	0.543703
251	0.357	0.739951	0.0277021	0
252	0.51	0.886985	0.715708	0.541597
253	0.425	1.64784	1.77154	1.02353
254	0.686	1.81723	3.25474	1.75038
255	0.918	0.775853	1.74698	1.98961
256	0.706	1.44192	1.58928	0.629377
257	0.324	1.60954	1.59275	0.931643
258	0.015	1.84078	1.87415	0.675678
259	0	2.25548	2.53164	0.600854
260	0	0.196389	0.73572	0.90782
261	0	0.80168	0.826294	0
262	0	0.728381	1.01428	0.702861
263	0	0.973813	1.50821	0.479228
264	0	1.45428	2.49926	0.331248
265	0	0	0.313544	0.737405
266	0	0.2289	0.411819	0
267	0	0.15491	0.271518	0.0160204
268	0	0.238723	0.590087	0
269	0	0.630355	1.10968	0
270	0	0	0	0.378398
271	0	0	0	0.0350953
272	0	0	0	0
273	0	0	0	0
274	0	0	0.228942	0
275	0.043	0	0	0
276	0.154	0	0	0
277	0.592	0	0	0
278	1.26	0.17066	0.491408	0.396474
279	1.364	0.360943	1.48735	0.887524
280	1.243	0.0675161	0.70189	1.18992
281	1.355	0.286065	0.944629	1.21547
282	0.955	0.416595	0.641601	0.747994
283	0.923	0.455164	0.844848	0.431413
284	0.521	0.54001	0.984638	0.0674896
285	0.58	0.296341	0.469491	0.609027
286	1.029	0.666298	0.87467	0.826527
287	0.725	0.721997	0.856261	0.735744
288	0.818	0.961876	1.27865	0.7284
289	0.58	1.07055	1.62768	0.598134
290	0.647	0.482025	0.896794	1.1981
291	0.902	1.02699	1.30058	1.1859
292	1.271	1.02483	1.34375	1.14287
293	1.298	1.44091	1.89801	1.52845
294	1.435	1.57873	2.48313	1.27253
295	1.12	0.409027	0.460673	1.42696
296	1.195	0.64928	0.646751	1.18784
297	0.651	0.562034	0.312872	0.638064
298	1.23	0.7314	0.615522	0.829628
299	0.481	0.821617	1.24891	0.134828
300	1.331	0.555618	0.389205	1.51851
301	1.335	1.22635	0.895241	1.57927
302	1.82	1.30499	1.10905	1.69909
303	2.279	2.01119	1.82847	2.5803
304	3.279	2.13021	3.01166	2.96177
305	2.746	2.8537	2.42299	2.99503
306	3.372	3.73074	3.25329	3.83176
307	4.936	4.18893	3.90776	4.56638
308	4.764	4.96021	5.12457	5.46605
309	6.892	5.06266	6.9376	6.56919
310	5.722	5.44869	6.69222	6.32
311	7.35	5.35498	6.35849	6.61144
312	6.132	5.69768	5.47977	6.04014
313	4.898	5.19154	5.13359	4.73433
314	4.349	5.0809	4.89518	4.17377
315	3.078	2.72617	2.62854	2.81094
316	2.249	2.72048	2.42352	2.13783
317	2.792	2.2857	2.30684	2.16111
318	3.926	2.22626	3.00815	3.19624
319	4.319	2.42282	4.57368	3.50626
320	5.099	4.53473	4.63494	4.52114
321	6.445	5.77231	5.48181	5.86653
322	6.891	6.18679	5.85085	5.89442
323	7.589	7.48293	7.0218	7.69803
324	9.625	7.51179	9.26514	9.25443
325	10.188	8.84708	9.66864	10.1537
326	11.334	10.5664	10.8259	11.4907
327	13.368	11.7274	11.504	13.1012
328	12.963	13.4871	12.598	13.5505
329	13.693	13.7655	13.9552	13.1256
330	15.26	18.5214	14.6404	15.6875
331	19.586	23.6028	21.6164	20.2413
332	27.964	26.0434	24.7813	28.3184
333	33.47	31.0038	31.6958	33.2052
334	32.67	31.6312	35.4773	34.9938
335	34.95	34.069	33.1732	35.3325
336	36.675	38.1167	37.0031	36.7883
337	40.471	40.5917	39.5654	41.2714
338	42.748	42.9053	41.9562	43.2606
339	42.764	43.1732	43.8475	43.391
340	43.84	42.3809	42.4753	44.8411
341	43.484	43.2505	43.7682	43.8032
342	43.366	44.1639	43.0968	43.6105
343	43.415	43.4179	42.8418	43.584
344	43.816	43.1716	44.0692	44.3466
345	44.761	43.2588	43.5469	45.7655
346	44.323	43.5006	43.8674	43.9733
347	43.676	43.4386	42.9289	43.6792
348	43.077	42.8572	42.4575	42.726
349	43.374	42.2914	43.2417	43.4008
350	42.051	43.2185	41.7865	42.9851
351	44.643	43.9665	43.3309	43.3978
352	44.965	44.3911	43.5269	45.0358
353	45.106	45.4703	44.0341	43.9304
354	44.813	44.4409	44.7809	44.5434
355	44.092	43.9024	43.0866	45.2631
356	44.92	44.2912	44.2602	44.6421
357	44.897	44.932	43.6045	46.2488
358	45.581	45.7094	43.9618	44.9403
359	44.177	44.5098	43.9754	44.6226
360	43.927	44.0733	42.296	45.0638
361	45.144	44.6777	43.8505	44.2007
362	45.729	45.2647	44.0653	45.6508
363	45.936	46.3085	44.9315	45.9509
364	45.905	45.3106	46.0956	46.62
365	45.802	45.4354	44.5999	46.8952
366	45.857	46.3198	45.5973	45.0929
367	45.883	46.9258	45.3266	45.8782
368	45.522	47.4927	45.6681	46.3454
369	45.828	46.554	46.6265	46.377
370	45.78	45.3478	45.4799	47.3953
371	45.922	46.2147	46.007	44.8763
372	45.64	46.6856	45.2307	44.5418
373	45.675	47.0305	45.5887	45.6735
374	45.978	46.1996	46.8714	46.0457
375	45.842	45.343	44.628	46.9088
376	45.758	46.3302	45.5866	45.1785
377	46.043	46.8861	45.3043	44.8402
378	45.763	47.2406	46.0983	46.3359
379	45.962	46.48	47.3646	47.1213
380	45.692	44.6979	45.7644	47.6768
381	45.987	45.2802	46.1362	45.6866
382	45.134	45.5315	44.9971	44.6754
383	45.581	45.3374	45.2057	45.2743
384	45.916	44.563	45.7837	46.6598
385	45.574	44.4357	45.4528	46.3284
386	45.822	44.2905	45.7652	45.9089
387	45.384	44.4128	44.0058	44.5158
388	42.891	43.365	43.8421	42.6155
389	43.841	42.2411	43.5431	43.7302
390	41.447	39.4637	42.56	43.1612
391	41.761	37.5611	40.4503	39.3665
392	32.591	36.6473	36.0392	34.7123
393	35.173	33.9407	33.8661	33.2373
394	27.311	32.2749	31.0942	30.6955
395	21.593	24.5192	21.6113	22.2289
396	16.707	23.8773	21.5758	18.0107
397	21.908	21.8471	22.6154	21.3521
398	26.453	21.763	24.532	24.7879
399	20.816	20.653	26.9852	23.6994
400	16.517	17.9673	15.9735	17.97
401	14.473	18.6983	16.319	15.0988
402	17.506	17.5401	17.1882	16.6749
403	21.194	18.4603	18.6327	20.0765
404	18.413	17.3172	20.863	19.7438
405	13.643	11.9436	13.4011	15.5005
406	12.424	10.8366	10.7917	12.2304
407	9.08	9.39832	7.95178	8.94662
408	8.076	8.17678	6.95464	8.19205
409	9.49	7.47827	9.60694	9.31683
410	13.006	12.424	10.6123	14.4782
411	13.876	14.4809	12.9774	14.1534
412	14.592	15.0582	14.9329	14.7985
413	19.593	16.9366	17.5362	17.9198
414	20.727	16.2654	19.152	21.3177
415	19.588	16.1856	18.8631	20.1981
416	19.754	17.0417	16.9973	18.6773
417	15.964	17.6866	16.0879	16.7505
418	17.433	16.6266	15.1919	16.6268
419	15.105	16.1583	14.6341	15.636
420	13.816	14.7091	13.8495	13.7446
421	15.006	14.9541	13.6384	15.2499
422	15.565	14.5459	13.9085	15.4769
423	14.883	13.213	13.816	14.2745
424	14.179	12.935	12.9342	14.7725
425	15.125	11.0646	14.2593	15.9753
426	13.439	10.3498	12.1025	13.2891
427	10.682	9.57814	9.33325	11.2956
428	7.911	7.57491	7.47338	8.13326
429	4.35	7.02134	4.76281	4.86151
430	3.97	3.18535	3.2706	4.84408
431	3.184	2.9808	2.88116	3.56008
432	2.724	1.8046	2.53747	3.46062
433	2.559	1.92245	3.13544	3.93089
434	4.641	1.78139	4.45331	4.3635
435	4.81	2.70669	4.19948	6.33755
436	4.075	3.14296	4.27983	4.76473
437	3.698	3.22672	3.80808	4.88591
438	4.148	3.76818	3.75623	3.80121
439	3.214	3.3816	3.62631	3.17598
440	5.922	3.36854	5.89146	6.63042
441	6.457	3.32446	5.13091	6.07178
442	4.732	3.61647	3.90544	4.37377
443	0.85	3.64064	3.21665	1.94573
444	1.991	3.34341	3.32232	2.52505
445	4.674	3.54816	5.91384	5.70006
446	4.727	4.21545	5.70427	5.51703
447	6.311	4.28664	5.06454	6.1643
448	1.654	4.38267	4.73498	3.35264
449	3.403	4.63286	4.02991	2.66944
450	5.634	4.80478	6.81169	6.87623
451	6.168	5.91967	7.20904	7.13943
452	10.012	6.45338	7.48382	9.83713
453	7.021	6.99074	7.40537	6.3817
454	5.403	7.24483	5.32669	3.46928
455	5.862	3.74521	4.89167	5.72085
456	4.315	4.3344	4.52707	5.08191
457	4.124	4.02661	3.99153	4.68891
458	2.702	3.84962	4.54175	3.85717
459	5.996	4.39856	5.80033	5.40415
460	7.081	5.15457	7.50315	7.58085
461	7.239	5.13344	6.98211	7.3271
462	4.289	5.308	5.1048	4.2792
463	4.758	5.03271	4.88604	4.34312
464	6.791	5.01104	6.39197	6.89706
465	8.802	5.78832	7.52371	8.03257
466	7.725	5.6388	7.31876	7.22461
467	6.467	6.01379	6.21743	5.90884
468	5.134	5.8355	5.93341	5.18899
469	2.87	5.56464	5.5599	4.6424
470	4.417	3.80229	4.69155	4.41164
471	3.622	3.91202	4.76303	4.02731
472	3.542	3.71636	4.42433	3.88214
473	3.139	3.85298	4.59514	3.53644
474	2.351	3.97068	4.3105	2.72917
475	2.425	1.24749	2.33207	2.45364
476	0.81	1.0653	1.91712	0.912123
477	0.193	0.657925	1.31671	0.842755
478	0	0.602273	1.5939	0.496262
479	0	0.633042	2.82552	0.661632
480	0.026	0.149005	0.544491	1.3094
481	0	0.287949	0.935346	0.273082
482	0	0.309762	0.953981	0.823219
483	0	0.752327	1.43466	0.496427
484	0	0.723225	2.01539	0.994921
485	0	0	0	0.440142
486	0	0	0	0.00527832
487	0	0	0	0.133586
488	0.068	0.22824	0	0
489	0	0.42351	0.286344	0
490	0	0	0	0
491	0.085	0	0	0
492	0.117	0	0	0
493	0.156	0.0895279	0	0
494	0.109	0.224562	0.294024	0
495	0.118	0	0	0.360581
496	0.04	0	0	0.0618466
497	0.046	0	0	0
498	0.007	0	0	0.0625989
499	0	0	0.00667578	0.0806906
500	0	0	0	0
501	0	0	0	0
502	0.054	0	0	0
503	0	0	0	0
504	0.026	0	0	0
505	0.173	0	0	0.32574
506	0.2	0	0	0.180227
507	0.075	0	0	0.0217228
508	0.055	0.0687131	0	0
509	0.094	0.0778376	0	0
510	0.093	0	0	0.635523
511	0.084	0	0.0520897	0.332271
512	0.137	0	0	0.180607
513	0.261	0	0	0.128736
514	0.136	0.00213939	0	0
515	0.042	0	0	0.139076
516	0.111	0	0	0
517	0.109	0	0	0
518	0.118	0	0	0.0377066
519	0.241	0	0	0.189843
520	0.056	0	0	0.239872
521	0.077	0	0	0
522	0.058	0	0	0
523	0.082	0	0	0
524	0.116	0	0	0
525	0.055	0	0	0.0812938
526	0	0	0	0
527	0	0	0	0
528	0	0	0	0
529	0	0	0	0
530	0	0	0	0.22522
531	0	0	0	0
532	0	0	0	0
533	0	0	0	0
534	0.018	0	0	0
535	0.102	0	0	0.287358
536	0.187	0	0	0.195721
537	0.24	0	0	0
538	0.331	0	0	0.0196994
539	0.306	0	0	0.0451271
540	0.556	0	0	0.804795
541	0.883	0	0.344568	1.10272
542	2.081	0.192148	0.138836	1.48546
543	1.331	0.605128	0.381709	1.18114
544	0.899	0.476159	0.0685218	0.564007
545	0.405	0	0	0.716642
546	0.453	0	0	0.363719
547	0.73	0	0	0.301405
548	0.799	0	0	0.283784
549	0.517	0	0	0.128323
550	0.311	0	0	0.656841
551	0.189	0	0	0.260735
552	0.203	0	0	0.00725662
553	0.952	0.0153455	0	0.570492
554	1.035	0	0.278768	1.16891
555	1.141	0	0.215746	1.39491
556	1.014	0	0.537068	1.20214
557	0.777	0	0.0576792	0.947822
558	0.636	0.0525192	0.0937015	0.843022
559	0.549	0	0.133864	0.93128
560	0.804	0	0.35282	1.23936
561	1.315	0	0.819437	1.40009
562	1.099	0.254805	0.380552	1.15616
563	0.596	0.550504	0.532695	0.839883
564	1.186	0.461988	0.499588	1.05486
565	1.516	0.771618	1.42634	2.39612
566	2.092	1.18346	2.04976	2.51849
567	2.384	1.68425	1.94039	2.65831
568	2.076	2.20562	2.21766	2.351
569	1.933	2.07273	1.87883	2.26369
570	1.746	0.471708	0.717555	2.41693
571	1.247	0.922387	1.13429	1.54711
572	1.554	1.14625	1.14326	1.76318
573	2.405	1.69133	1.77256	2.4399
574	2.693	1.65498	2.57113	2.73889
575	3.758	3.1729	3.02786	4.09398
576	4.975	4.25862	4.58155	5.26633
577	6.533	5.15836	5.68875	6.37854
578	6.239	6.38432	6.58054	6.84905
579	7.995	6.35673	6.30181	7.78232
580	6.952	8.34953	9.10343	8.26124
581	11.827	9.28024	10.7474	12.7361
582	15.915	10.7154	11.3656	14.9669
583	8.302	11.3994	11.3119	10.0472
584	9.841	11.3565	8.2936	8.92197
585	12.091	10.2651	11.4552	12.7278
586	12.462	10.5015	11.802	13.0122
587	12.058	10.828	10.9193	11.9844
588	9.487	10.4557	10.7851	9.57214
589	10.695	10.5748	9.74191	10.8186
590	13.336	10.1575	12.7807	13.7213
591	13.114	9.2699	11.8146	11.9996
592	8.074	9.26297	9.2538	8.44458
593	8.388	8.105	7.913	7.49891
594	6.141	7.66487	6.80049	7.51592
595	6.633	6.42671	6.01562	6.40164
596	6.064	6.37437	6.86548	7.08377
597	8.892	6.24087	7.45112	7.7387
598	6.37	6.68913	7.82358	7.50066
599	7.158	6.19455	6.93578	7.06569
600	5.901	5.03462	5.79533	6.3888
601	6.417	5.1338	5.83218	6.73887
602	5.34	5.01057	4.96897	5.6372
603	5.198	5.44556	4.97396	5.37412
604	4.375	4.88997	5.01136	5.32469
605	7.35	4.71067	6.20174	7.42586
606	5.837	4.35514	6.0153	6.22816
607	4.41	4.64237	4.82704	4.59201
608	4.849	4.86336	4.52214	4.91471
609	3.458	4.32581	4.90404	5.47252
610	4.035	4.53908	2.36211	4.40017
611	3.395	6.03645	4.63383	3.87668
612	7.015	6.50038	7.45066	7.24337
613	10.98	8.13565	9.8345	10.3682
614	10.162	8.09818	10.8413	10.9993
615	6.16	6.00155	7.06346	7.05252
616	6.754	5.75231	6.23177	6.93212
617	6.627	5.85182	5.42642	6.70448
618	4.767	4.95705	4.90669	4.79148
619	3.938	4.60597	4.41062	4.23434
620	2.986	2.95815	3.0599	4.89569
621	2.459	2.18306	2.71263	3.27512
622	2.162	1.70336	1.97375	2.1757
623	1.926	0.902776	1.82581	1.81965
624	1.054	0.436645	1.68044	2.56253
625	0.479	0	0.520635	1.4294
626	0.842	0.0300203	0.654843	1.15815
627	0.698	0	0.813945	1.1145
628	0.503	0.131228	1.1964	1.03037
629	0.31	0	0.987232	0.930729
630	0.528	0	0.162804	0.832542
631	0.487	0	0.638678	0.804283
632	1.275	0	0.635487	1.53651
633	0.531	0.85254	1.00094	1.57347
634	1.417	0.496615	1.48022	1.45035
635	2.211	1.24036	1.80803	3.09594
636	2.526	2.0495	2.64725	2.84047
637	3.01	2.84932	3.18509	3.64316
638	3.306	3.68144	3.74755	3.71664
639	3.206	3.63344	3.5241	3.592
640	4.634	2.76678	3.10646	5.20514
641	3.17	3.83888	3.93482	3.51848
642	3.511	4.29799	4.89552	3.76796
643	5.586	5.10356	6.21739	6.16133
644	6.622	5.22899	7.67742	8.24249
645	4.465	2.49228	3.35019	5.23075
646	2.06	2.50275	2.62654	2.79478
647	0.452	2.12455	2.11488	1.76925
648	2.211	1.5066	2.58497	2.78372
649	4.609	1.61069	5.34482	4.61695
650	10.615	7.46567	10.5897	11.6186
651	12.553	7.09548	10.6896	12.159
652	8.394	8.15663	8.88945	8.39538
653	6.535	7.5444	7.41632	5.32572
654	3.587	6.62512	4.17906	4.57459
655	2.235	1.51382	2.33466	3.25095
656	2.405	1.05685	1.88229	3.00391
657	1.852	0.400395	1.67704	1.85975
658	1.441	0	1.89548	1.5887
659	0.814	0.123119	1.39946	1.64391
660	0.422	0.231032	0.445359	1.67627
661	0.67	0.471437	0.917716	1.69615
662	1.719	0.262782	0.95279	1.50854
663	1.926	0.852495	1.555	2.03971
664	2.385	0.716418	2.18765	2.11533
665	2.294	0.377308	1.91457	2.66345
666	2.465	0.1974	1.93977	2.53054
667	1.314	0.559308	1.08133	1.77507
668	0.166	0.619916	0.670907	0.748475
669	0	0	0.406846	0.514098
670	0	0	0	0.565414
671	0	0	0	0.154954
672	0	0	0	0.155974
673	0	0	0	0
674	0	0	0.109529	0.183481
675	0	0	0	0.78756
676	0	0	0	0
677	0	0	0	0.032473
678	0	0	0	0
679	0	0	0.349299	0
680	0	0	0	1.13577
681	0	0	0.184811	0.62045
682	0	0	0	0.584514
683	0	0	0.259394	0.655036
684	0	0	0.0956824	0.361978
685	0	0	0	0.833501
686	0	0	0.179024	0.653635
687	0	0	0	0.274289
688	0	0	0	0.247088
689	0	0	0	0.0462889
690	0	0	0	0
691	0	0	0	0
692	0	0	0	0
693	0	0	0	0
694	0	0	0	0
695	0	0	0	0.480485
696	0	0	0.338824	0
697	0	0	0	0.173925
698	0	0	0	0.0907753
699	0.39	0	0.00351107	0
700	0.591	0	0	0.838296
701	1.638	0.863305	1.08045	1.46248
702	3.203	1.39658	2.15249	2.75965
703	3.671	2.54666	3.79158	3.8588
704	5.657	2.75255	5.06698	5.57832
705	4.072	1.17773	2.9952	4.08767
706	2.579	1.49703	2.74489	2.56272
707	1.944	1.73165	2.28586	2.27042
708	2.63	1.86465	2.64699	2.49467
709	2.922	1.98644	3.8611	3.6798
710	3.935	4.79776	3.73386	5.45077
711	5.841	6.23027	6.04042	6.17978
712	6.771	7.07833	7.54264	6.36167
713	10.122	8.41455	9.67124	8.64279
714	11.708	8.65646	11.8237	12.29
715	16.811	12.1721	16.6365	17.2279
716	17.507	11.5875	15.5471	17.097
717	13.222	12.8453	12.66	12.9281
718	8.454	11.3712	10.2889	8.58208
719	4.16	10.9299	5.93347	5.93972
720	2.461	3.42656	2.80928	4.02418
721	1.582	2.73549	2.45543	3.6235
722	1.921	1.47237	2.32334	2.96347
723	1.287	1.06983	2.67923	3.17614
724	1.632	1.40852	2.76649	2.63462
725	1.952	3.54731	1.73415	3.25642
726	4.512	5.50766	4.14221	4.89953
727	6.283	5.92547	6.03345	6.37858
728	8.252	8.49219	8.24092	8.24414
729	9.29	8.5268	10.242	8.96237
730	12.852	11.3706	12.0996	13.9375
731	14.338	12.7604	14.0221	14.2904
732	14.48	14.7435	15.0921	14.5369
733	15.146	16.3276	15.6759	14.4486
734	14.406	15.8152	14.9786	15.7312
735	12.556	11.2736	12.1866	13.4489
736	9.814	10.1172	10.8639	11.2338
737	9.356	9.82548	9.06748	10.0282
738	6.392	8.01147	8.41343	8.07815
739	7.105	8.24059	8.51773	7.73516
740	9.796	9.8424	11.4205	10.9111
741	11.126	8.9315	11.2676	11.5152
742	8.91	8.74917	9.63264	10.126
743	5.577	7.94366	8.42508	6.75811
744	4.03	7.20408	6.33414	4.77539
745	3.69	3.73104	4.7513	5.02097
746	4.048	3.79165	4.36939	4.5197
747	2.33	3.25567	3.76277	3.78272
748	2.882	3.5841	4.05606	4.00741
749	3.732	3.22282	4.74736	4.51749
750	4.407	3.61501	4.24049	5.36153
751	3.623	4.48641	4.88255	4.11867
752	3.555	4.99285	4.88922	3.52688
753	5.827	6.63474	6.47007	6.61656
754	10.302	6.44433	9.90217	9.99471
755	7.635	6.86707	6.307	8.04282
756	6.306	8.05912	8.03267	7.51735
757	11.529	9.16304	9.71264	11.2363
758	11.482	10.526	11.3972	12.455
759	11.245	10.3019	13.1101	12.1356
760	10.312	9.73758	10.4464	11.5493
761	11.415	11.108	11.1935	12.0714
762	12.197	11.7348	11.8401	13.263
763	11.959	12.3911	12.7952	12.919
764	14.031	12.8827	13.1415	13.5723
765	15.592	17.7853	15.8441	16.8588
766	20.085	20.6259	19.5986	19.7179
767	24.472	22.4339	22.3274	23.9318
768	24.264	24.5572	25.4559	24.7173
769	25.797	24.33	27.1802	27.2628
770	25.912	21.1856	24.9846	26.5809
771	19.962	19.4404	21.869	21.0779
772	19.003	19.4352	18.0716	17.9895
773	13.277	15.7965	15.1789	14.2606
774	11.743	15.3243	13.0909	12.1378
775	10.72	9.14916	10.6709	12.0928
776	6.413	6.15736	7.54292	7.4719
777	3.844	3.67693	3.90424	2.92687
778	1.39	0.912252	1.57082	1.67747
779	0.062	0.235897	1.19231	0.987901
780	0	0.621706	0	0.530565
781	0	0.576715	0	0
782	0	0	0	0
783	0	0.167166	0	0
784	0	0	0	0
785	0	0	0	0.509894
786	0	0	0	0.371763
787	0	0	0	0.256481
788	0.112	1.38085	0.118988	0.826325
789	0.059	0.682583	0.540843	0.650392
790	0	0	0	0
791	0	0	0	0
792	0	0	0	0
793	0.076	0	0	0
794	0.156	0	0.0304184	0
795	1.333	0.678874	1.28987	1.49319
796	1.833	1.12941	1.00157	1.9803
797	1.306	1.50755	1.20597	1.63563
798	1.193	1.55346	1.06963	1.33119
799	1.565	1.46792	1.46522	1.46879
800	1.297	0	1.81856	1.45145
801	1.028	0.360453	1.09461	0.902218
802	0.391	0.111707	0.156792	0.133077
803	0.434	0	0.0105327	0.671886
804	0.596	0	0.595411	0.638398
805	0.522	0	0	1.3266
806	1.253	0.613647	0.189855	1.29078
807	1.594	0.892452	0	1.07189
808	2.263	2.17658	1.20767	2.72025
809	6.54	2.52323	4.7517	4.83374
810	10.858	12.7588	10.819	11.391
811	17.292	17.9838	18.3835	18.2609
812	24.453	21.2869	20.8602	23.2443
813	25.447	26.3861	27.7575	27.3056
814	30.666	26.7735	31.8015	31.5243
815	31.313	27.8533	29.9074	31.574
816	32.418	31.2055	32.9645	31.5441
817	34.529	33.9636	34.1061	34.9545
818	37.3	35.5373	36.1947	36.6761
819	38.27	36.0746	37.5915	37.3713
820	37.096	35.5875	35.7108	38.0859
821	38.133	37.1529	38.2242	37.9973
822	37.449	38.2204	37.286	37.8377
823	37.708	37.9016	38.6246	39.1109
824	39.986	37.9788	41.0239	41.6899
825	43.214	40.6828	42.2131	43.958
826	40.636	41.9131	43.7723	41.8523
827	42.079	42.6958	43.2137	42.2432
828	40.753	42.7999	43.3279	42.0915
829	42.787	42.0856	44.4284	44.0533
830	39.524	40.692	40.4155	42.3033
831	39.825	40.9666	41.1294	40.4776
832	41.4	40.9425	40.1729	41.2723
833	39.303	40.9395	40.7418	40.0609
834	42.113	40.4459	42.6786	41.8951
835	41.517	38.9325	40.1832	42.6859
836	38.722	38.2025	39.9554	38.3663
837	37.776	37.9834	37.303	38.1809
838	37.874	37.7359	36.4136	36.5916
839	34.587	36.4701	35.2255	36.1584
840	31.074	33.6074	30.9311	31.9142
841	31.838	33.7864	32.2555	31.955
842	35.721	33.6789	33.128	35.3842
843	35.009	35.0093	34.4263	34.7731
844	35.744	33.8233	36.2728	35.3647
845	37.147	35.4137	35.2463	38.1417
846	37.238	35.5766	35.6181	36.6498
847	33.91	36.0162	34.7253	34.2902
848	34.262	36.3657	34.5432	34.3071
849	35.793	35.0158	35.6893	36.5339
850	35.78	32.0515	34.5008	36.3451
851	30.198	30.1022	32.4173	30.9205
852	28.598	29.8294	28.9138	29.3877
853	27.208	27.8928	27.0284	26.8041
854	23.348	26.1837	26.9421	24.5925
855	26.813	27.5971	28.1106	28.491
856	28.793	27.7368	28.3717	28.6375
857	24.573	27.6144	27.4204	26.1699
858	23.545	27.6684	27.4261	24.9651
859	24.537	26.6235	27.0079	25.9814
860	25.258	24.3767	26.6623	27.2186
861	25.262	25.0351	26.8397	25.8209
862	25.565	25.5229	26.1134	25.7734
863	25.133	26.2192	26.3541	25.6133
864	23.74	25.2353	25.3914	24.2247
865	19.467	21.2625	19.5482	20.4034
866	19.753	22.9591	21.248	20.2619
867	23.618	23.3778	23.1208	23.8871
868	25.948	24.9808	26.0278	25.9871
869	26.973	24.9838	28.9179	27.1091
870	26.34	27.4361	28.0461	28.7544
871	30.76	29.1774	29.8164	30.1211
872	29.199	30.6865	30.431	30.259
873	28.301	31.5065	31.4844	29.4193
874	30.951	31.2735	32.4064	31.4626
875	31.084	29.2503	31.7728	32.6166
876	29.086	29.2374	31.3974	30.5381
877	29.088	29.8748	29.8647	29.7242
878	26.507	28.5241	29.8071	27.6295
879	27.774	28.3957	29.5798	28.3737
880	28.209	28.707	29.8745	30.6172
881	28.567	29.277	30.1514	28.7067
882	30.051	29.3038	29.3252	29.1051
883	26.959	28.6354	29.4187	27.2054
884	26.431	28.3537	27.8321	26.7064
885	22.909	22.5501	22.9224	24.005
886	21.367	21.9229	21.7329	21.8572
887	23.312	20.9531	20.4172	22.3929
888	18.789	19.7489	19.7174	19.7099
889	18.447	19.2654	18.6046	18.2561
890	16.506	17.5157	16.4422	18.4683
891	15.977	17.0853	16.8169	17.4324
892	19.922	16.4387	16.3839	19.2686
893	17.497	16.2809	15.9381	16.4418
894	12.019	15.325	13.1515	13.5415
895	10.959	9.99391	9.20083	12.2007
896	10.03	9.9727	8.38309	10.8557
897	9.358	8.57095	7.81908	9.07857
898	9.15	8.84909	8.35406	10.1084
899	11.543	8.63245	10.3721	12.4839
900	13.033	9.97516	10.8853	13.2046
901	9.367	9.1435	9.84792	10.9744
902	7.919	8.98241	7.79962	8.70492
903	6.08	8.40249	6.69022	7.53052
904	5.343	7.02422	6.66558	7.11925
905	3.77	4.46429	5.03043	4.98433
906	4.323	4.36299	4.32967	4.59836
907	4.092	3.6216	4.08546	4.42132
908	3.774	3.40271	4.19221	3.72251
909	3.326	2.74351	4.1472	3.38651
910	3.155	1.37073	1.90392	2.50566
911	3.104	1.75898	0.903316	1.72764
912	2.651	1.07196	0.462172	0.984353
913	1.872	1.08348	0.55593	0.655534
914	1.408	0.89611	1.14157	1.03191
915	1.193	0	0.064627	1.48332
916	0.866	0.0813328	0	0.689621
917	0.517	0	0	0.648912
918	0.317	0	0	0.286079
919	0.322	0	0	0
920	0.335	0.872175	0.131133	1.57185
921	1.75	2.43123	1.26414	3.02816
922	4.244	3.06039	2.90139	4.85172
923	2.722	4.25386	4.16391	3.98245
924	3.94	4.7714	4.38983	3.82844
925	6.744	7.13013	6.78025	7.11547
926	8.874	10.2703	9.76303	9.96614
927	13.805	11.5194	12.3634	13.3944
928	12.251	13.8675	14.9464	13.8181
929	15.106	14.5967	16.1364	14.9441
930	13.72	11.8611	14.4444	15.3561
931	13.728	12.331	12.9304	13.279
932	12.458	12.9321	10.6551	11.8744
933	8.672	11.8522	10.1116	9.04525
934	8.989	12.9631	11.4537	8.46063
935	18.117	17.8837	17.3831	18.8782
936	20.652	20.4089	20.9763	19.8272
937	21.838	21.7529	22.9056	21.4359
938	22.967	23.7566	25.1106	23.1042
939	22.079	23.9409	25.5817	24.9741
940	20.369	16.1294	18.114	19.9017
941	15.282	16.6161	16.0362	15.26
942	12.878	15.8184	14.6277	12.6949
943	15.788	15.0843	14.8623	15.844
944	16.832	16.1359	19.1454	16.6776
945	20.621	26.639	22.7054	22.4313
946	31.068	29.6466	28.7337	29.9744
947	32.256	31.9044	30.6304	31.7243
948	34.024	35.2784	34.2682	32.8486
949	35.154	34.9929	35.6547	36.3978
950	37.321	34.2277	35.7045	37.3308
951	36.032	34.8789	36.1731	36.7007
952	35.851	36.3998	35.9347	35.5819
953	36.16	35.5291	35.5691	36.1264
954	31.817	35.6193	33.6158	34.0847
955	26.619	27.4429	27.7135	27.2746
956	23.838	24.8669	25.3782	24.4207
957	22.443	22.8529	21.906	22.7939
958	22.096	19.8939	21.1055	21.8751
959	16.63	19.8212	22.7335	18.3586
960	17.824	17.9153	15.2625	17.3038
961	13.878	18.979	16.2045	14.8801
962	17.884	17.6308	17.286	17.4934
963	20.435	19.6278	19.4889	21.1161
964	22.353	19.1467	25.1652	21.7301
965	26.694	29.2407	24.5456	27.7381
966	30.744	33.9429	30.6394	29.8778
967	36.745	37.2137	35.9721	36.7044
968	41.198	42.9593	41.0325	41.4815
969	43.196	42.1816	45.8498	43.9779
970	40.196	39.7584	39.1012	41.8216
971	39.204	41.5685	40.2086	39.166
972	41.323	43.3126	41.5811	42.1927
973	43.403	43.743	42.9325	44.6085
974	42.392	44.0822	45.5978	45.0018
975	40.973	44.5996	42.8938	43.3067
976	46.739	46.367	45.1481	45.4937
977	47.047	46.9961	46.2741	47.8855
978	46.98	47.3011	47.7849	47.2005
979	47.398	47.4265	48.708	47.8826
980	47.464	46.4135	46.2908	47.8054
981	46.853	48.0898	47.3872	47.3533
982	46.96	48.4328	48.0377	47.9495
983	47.277	48.4197	48.9353	48.217
984	47.438	48.1367	50.5494	48.5643
985	47.492	47.4668	47.1673	49.0052
986	46.769	48.3229	47.6949	46.5855
987	47.58	48.5192	46.9448	47.0094
988	47.333	48.8868	47.4727	47.137
989	47.532	48.2636	49.538	47.2012
990	46.458	47.1955	44.5319	48.0586
991	45.122	48.3546	46.506	45.6111
992	46.682	48.5716	47.2536	47.5096
993	47.589	49.5818	48.7208	48.3265
994	47.323	48.9341	50.3762	48.9259
995	46.567	47.272	46.7154	49.1663
996	47.633	47.8883	47.4245	47.6369
997	47.423	48.2222	46.8057	47.6339
998	46.991	48.6208	47.1304	47.6776
999	47.457	47.9395	48.1649	48.29
1000	46.406	45.8883	44.3894	47.5215
1001	46.917	46.734	45.5447	45.8888
1002	47.574	46.6776	45.4538	46.5837
1003	47.561	47.255	46.5926	47.0979
1004	47.635	46.5261	48.3537	48.4085
1005	47.538	46.5585	46.1025	48.542
1006	47.502	47.1763	46.2979	46.6364
1007	46.115	47.4378	45.5456	46.1509
1008	44.913	47.3294	45.5086	45.2469
1009	45.196	46.4504	46.7494	45.7379
1010	45.317	45.9512	45.9507	47.721
1011	45.389	46.4725	46.3131	46.5733
1012	44.659	46.4361	45.2188	45.4408
1013	44.563	46.1329	45.3357	45.6781
1014	44.72	45.3904	45.8195	46.84
1015	44.52	43.9533	43.9755	46.639
1016	44.825	44.7608	44.1795	45.3114
1017	45.445	44.6742	42.9441	44.4571
1018	45.025	44.6821	43.4226	44.9283
1019	44.55	44.1869	43.6291	45.4919
1020	43.852	42.2315	40.0962	44.3724
1021	40.829	43.419	41.224	42.1591
1022	44.434	43.5072	41.4735	43.6054
1023	45.001	44.0979	43.0387	45.4458
1024	43.962	43.2585	44.6754	45.5531
1025	44.54	43.6537	43.2975	45.4807
1026	44.483	44.5777	43.9783	44.0792
1027	44.277	44.9837	43.5228	44.2363
1028	44.458	44.9971	43.5767	44.8527
1029	42.422	43.9718	43.2472	44.4365
1030	42.535	43.0876	42.3583	43.6768
1031	43.413	43.9104	43.5754	43.0268
1032	44.589	43.9851	43.4899	44.1559
1033	44.172	44.0114	43.9236	43.8138
1034	41.355	43.2599	42.5761	43.3038
1035	41.271	42.6543	41.3895	42.8615
1036	44.241	44.0463	42.5981	43.1092
1037	44.701	44.1468	42.9818	44.364
1038	43.937	44.4944	44.107	43.8706
1039	44.084	44.0638	44.3796	44.9661
1040	43.891	43.5958	43.0078	45.4377
1041	44.191	44.494	43.5433	44.0093
1042	44.737	44.7441	42.7044	44.3384
1043	45.353	44.5348	42.9006	44.5643
1044	43.259	43.9334	42.6006	44.566
1045	40.394	41.3599	41.3076	41.8214
1046	42.671	41.5065	41.3228	42.178
1047	42.212	41.2388	40.1543	42.3377
1048	39.841	40.452	39.9266	40.1558
1049	36.952	39.7619	39.152	38.0733
1050	38.148	36.7523	33.9149	38.7922
1051	34.217	38.4645	35.025	34.6878
1052	34.236	37.7174	35.9446	34.7188
1053	42.396	39.0851	38.7878	41.7472
1054	44.854	38.7801	43.9968	45.8841
1055	46.599	43.8886	43.8107	46.497
1056	46.206	45.5347	44.6688	45.4515
1057	46.393	46.9468	44.2503	45.8158
1058	46.989	47.7128	44.5781	46.9825
1059	46.839	46.6601	46.7871	46.752
1060	47.283	45.8946	45.6137	48.301
1061	47.135	46.8219	46.6469	46.6068
1062	47.532	47.3006	46.5449	46.907
1063	46.76	46.9604	47.0854	47.2605
1064	46.596	46.625	46.6932	47.8044
1065	47.355	46.3369	46.3466	47.9866
1066	47.246	47.4325	46.9109	45.9913
1067	47.622	47.3758	46.2694	47.4316
1068	47.153	47.0693	46.9354	46.8202
1069	47.067	46.8544	47.8729	47.096
1070	47.415	45.772	46.6165	48.3664
1071	47.129	46.4062	46.7463	46.096
1072	45.709	46.3038	45.4466	45.383
1073	45.287	45.8965	45.5617	45.0433
1074	45.629	45.3445	46.2986	46.4873
1075	44.491	45.3611	44.0859	46.4588
1076	45.134	46.1399	45.2896	44.5034
1077	45.059	46.3803	45.2206	45.425
1078	45.426	46.559	45.8779	45.0783
1079	44.162	45.8219	45.933	45.7161
1080	41.598	42.6287	42.8185	43.4644
1081	43.084	42.9086	43.0996	42.6273
1082	43.6	42.6186	42.3939	43.3492
1083	40.833	42.4909	42.6422	41.5317
1084	40.83	41.8559	43.2305	41.0778
1085	36.538	36.2805	35.5371	37.1893
1086	33.677	36.4322	35.0694	33.4655
1087	35.353	35.4895	34.2634	34.76
1088	35.481	35.5197	35.3965	35.423
1089	37.77	35.1814	39.1992	36.8819
1090	38.641	40.5031	38.2788	40.7603
1091	43.256	43.0955	41.3258	41.438
1092	43.12	44.4588	43.5122	43.451
1093	45.342	46.774	45.8742	44.5205
1094	46.725	46.0356	48.6378	47.1842
1095	43.902	42.6897	43.0485	44.922
1096	41.674	43.5735	42.9795	41.6621
1097	42.668	44.0459	42.8196	42.792
1098	42.187	43.6349	43.6572	42.9356
1099	42.975	43.3803	45.8856	44.1901
1100	41.029	41.579	42.8103	42.9019
1101	40.586	41.5904	42.3291	40.532
1102	39.816	41.1137	40.4082	40.307
1103	39.397	39.8523	39.9848	38.7999
1104	38.295	39.4342	39.686	37.6903
1105	36.08	36.2138	35.9096	37.8573
1106	37.394	36.6289	35.8369	35.8072
1107	33.929	36.1254	35.2144	33.5569
1108	35.973	35.894	36.0437	35.168
1109	35.842	35.513	37.5865	36.9942
1110	36.225	35.7905	34.9986	36.9915
1111	34.921	36.3558	36.0619	35.7338
1112	36.258	36.6224	36.0654	35.8164
1113	36.202	36.9289	36.7929	35.0736
1114	34.515	35.7304	36.8837	35.4047
1115	33.721	30.0154	34.696	34.2825
1116	31.2	27.9776	31.3561	31.9195
1117	28.476	27.001	26.7163	28.1043
1118	18.535	24.5972	23.1903	21.3763
1119	18.817	23.5101	20.4572	18.104
1120	21.549	27.6225	22.5634	23.4017
1121	28.945	30.2658	28.0064	27.441
1122	31.32	30.836	30.9786	31.1068
1123	36.093	34.1109	35.1398	32.4356
1124	32	33.5435	34.379	34.4802
1125	30.999	30.3606	34.9011	33.4487
1126	36.617	29.8346	32.919	34.5001
1127	30.022	30.3603	29.992	31.1988
1128	24.786	28.1018	27.2436	24.816
1129	18.442	27.4552	21.5548	20.0863
1130	16.405	14.7631	15.7472	17.1432
1131	10.189	11.8953	12.105	11.5601
1132	7.414	8.53991	8.33805	6.78414
1133	6.782	5.31768	7.00598	6.59881
1134	6.629	5.18912	8.72058	7.45964
1135	7.078	6.73899	5.96726	7.71508
1136	5.425	7.21069	5.83129	6.4916
1137	4.835	5.72552	4.84848	4.50677
1138	5.167	6.28176	5.45745	5.46508
1139	6.295	5.62786	7.15839	5.61286
1140	7.75	6.59205	7.25867	9.74077
1141	8.556	7.61384	7.79262	9.06071
1142	8.625	8.14654	7.86954	7.98273
1143	9.368	9.59649	8.53826	8.34586
1144	8.568	8.85162	8.42887	9.35732
1145	6.916	3.70459	5.51111	7.30155
1146	4.11	3.14497	3.17332	3.75411
1147	1.648	2.36937	2.17767	2.02946
1148	0.548	0.831739	1.05013	0.723818
1149	1.376	1.08667	0.806749	0.393397
1150	0.819	0.25493	0	1.41447
1151	0.012	0.34098	0	0
1152	0	0	0	0
1153	0	0	0	0
1154	0.141	0	0.401028	0.751931
1155	0.07	0	0	0.232332
1156	0.031	0.629524	0	0
1157	0	0.470098	0	0.136027
1158	0	0.699772	0	0.312088
1159	0	0.997922	0.369319	0.722519
1160	0	0	0	1.17227
1161	0	0.495285	0	0
1162	0	0.450036	0	0
1163	0	0.555922	0	0
1164	0	1.1038	0	0
1165	0	0.210813	0	0.539765
1166	0	1.21787	0	0
1167	0	1.3597	0	0.232155
1168	0	1.77248	1.09788	1.33333
1169	0.576	2.39817	2.89716	2.43453
1170	0.649	0.567889	1.14998	1.94327
1171	0.538	1.04061	0.957952	1.34783
1172	0.854	1.1244	0.767071	1.20901
1173	1.047	0.917055	0.832654	1.49073
1174	0.839	1.4761	1.3544	1.24743
1175	1.418	0	0	0.466745
1176	1.534	0.805943	0	0.539512
1177	2.22	0.670593	0.139186	1.06156
1178	2.577	1.37477	1.3469	1.61617
1179	2.974	1.7238	3.77091	2.3067
1180	4.426	2.85838	3.19735	4.49608
1181	4.48	4.0001	3.93052	3.93677
1182	4.062	4.56713	4.39412	4.13183
1183	5.067	5.47999	5.24885	4.53281
1184	5.38	5.60595	6.37987	5.31983
1185	7.665	8.33858	8.04537	8.56919
1186	9.184	9.88652	9.95069	10.8163
1187	14.271	11.0728	11.6653	13.6527
1188	10.884	12.2196	12.445	11.9623
1189	11.081	12.4464	11.2616	10.8488
1190	14.331	12.7009	13.8039	15.2055
1191	16.712	13.9259	14.8015	16.7893
1192	15.032	14.5467	14.0404	15.3659
1193	12.718	14.906	14.7102	13.9165
1194	16.248	15.5463	14.577	14.9466
1195	18.624	17.5654	18.637	18.7528
1196	21.24	18.4744	20.048	21.3038
1197	20.905	19.5462	18.8529	20.4328
1198	17.492	20.0977	19.3582	17.9493
1199	19.327	19.9196	19.9179	18.607
1200	24.868	22.1136	22.5105	24.8765
1201	23.826	24.072	24.536	23.65
1202	23.523	25.2412	24.7801	22.9301
1203	25.499	26.8026	26.6421	25.4253
1204	28.958	26.8143	28.665	28.2075
1205	27.47	29.0641	28.0963	28.1412
1206	31.924	30.8407	30.9983	30.6209
1207	33.418	32.3538	31.4822	32.6784
1208	32.95	33.7979	33.4288	32.9666
1209	32.785	33.6302	34.5027	32.5498
1210	31.526	31.0107	31.5132	31.6085
1211	32.244	31.1982	31.6814	31.6697
1212	31.101	31.4093	30.5761	31.1786
1213	29.986	30.862	30.8752	30.0538
1214	31.801	31.0291	32.7141	31.163
1215	36.701	33.8201	35.1944	36.8867
1216	35.71	34.045	35.6145	35.0547
1217	34.278	34.647	33.7829	33.5055
1218	33.732	34.7007	33.54	32.62
1219	32.671	34.187	34.9849	32.7533
1220	37.209	34.4556	34.9859	36.9869
1221	35.455	34.7813	35.3346	35.1183
1222	33.847	35.1448	34.1162	33.0235
1223	34.162	35.1936	34.6986	33.6232
1224	36.411	34.6783	37.1932	36.1264
1225	38.514	34.028	37.2391	39.9928
1226	36.426	32.9065	35.3495	34.3025
1227	28.708	32.8828	31.0926	29.4316
1228	30.291	31.6692	29.3223	29.746
1229	27.058	30.7091	28.7139	28.3728
1230	21.235	28.9278	23.1573	22.341
1231	26.467	31.191	27.0481	26.812
1232	33.364	31.6166	31.1943	33.4958
1233	34.855	34.8511	35.0757	35.697
1234	35.185	34.6626	37.9876	36.8769
1235	35.983	37.3051	34.9761	37.1648
1236	39.065	40.7709	37.9566	39.1297
1237	42.55	42.8835	40.7367	42.7627
1238	43.32	45.8429	43.11	44.0444
1239	43.823	45.8249	45.001	44.444
1240	43.701	44.0105	42.7438	45.4306
1241	46.022	45.3006	44.4948	45.7989
1242	45.902	46.7468	44.8722	47.2855
1243	46.311	46.9705	46.024	47.1289
1244	46.674	47.0867	47.9106	47.0811
1245	47.282	46.4098	45.9508	48.815
1246	46.801	47.357	46.7448	46.5283
1247	47.189	47.7649	46.3677	46.7641
1248	46.378	47.1693	46.9778	46.173
1249	45.103	47.1766	47.1198	45.6355
1250	46.832	46.3823	46.4652	47.302
1251	46.522	47.5873	47.648	45.4626
1252	47.5	47.8138	47.4083	45.9714
1253	46.071	48.2737	48.1484	47.1481
1254	46.7	47.5806	48.6748	46.7934
1255	46.611	46.2631	46.2369	47.6832
1256	46.934	47.1056	46.9381	46.6695
1257	47.135	47.4179	45.8942	47.3585
1258	45.903	47.7805	46.0177	46.3476
1259	45.405	46.8146	46.0925	45.8387
1260	45.32	45.5265	44.0345	47.4347
1261	46.349	46.2065	45.618	45.6316
1262	46.389	46.7447	45.7178	46.3167
1263	46.255	47.4659	46.4426	46.3831
1264	46.197	46.6858	46.4528	46.8457
1265	46.377	45.6002	44.9421	47.502
1266	47.166	46.4418	46.205	46.8901
1267	47.458	46.7952	46.2492	47.584
1268	46.525	47.1387	46.6807	46.6726
1269	46.138	46.3752	46.69	47.0154
1270	44.589	41.7671	43.6424	45.8307
1271	41.554	41.3379	42.0396	42.5518
1272	39.19	40.6851	38.9275	39.3909
1273	36.195	39.6225	38.619	39.1038
1274	43.015	38.9246	41.8484	41.9891
1275	44.677	43.4322	42.7847	45.4597
1276	44.327	44.6568	44.0093	43.0293
1277	43.065	45.2395	43.8015	42.7309
1278	44.689	46.1029	44.7094	44.0062
1279	44.389	44.7176	47.3726	47.0259
1280	42.308	40.2124	41.8604	43.6875
1281	38.725	39.43	39.8713	39.5495
1282	38.397	38.8055	37.0517	37.1795
1283	35.945	36.8753	36.1106	36.1635
1284	36.136	35.8685	36.6534	36.6954
1285	36.432	33.2801	35.7889	37.7452
1286	33.594	30.5776	32.6774	33.4715
1287	28.215	28.9322	27.4171	27.5891
1288	25.976	25.6131	24.3704	24.8023
1289	19.276	23.8843	22.0071	22.1785
1290	18.035	16.7832	16.4341	18.441
1291	14.262	15.0383	14.4163	15.0948
1292	13.098	12.1284	12.0166	12.577
1293	11.742	10.5738	11.3172	12.3651
1294	9.623	9.43347	11.4705	10.8928
1295	11.124	9.92058	8.87915	11.2795
1296	9.462	10.3496	9.21655	9.49271
1297	8.944	9.43097	8.83383	8.45187
1298	9.927	10.6555	9.8515	9.78144
1299	8.433	9.35079	10.9995	9.5449
1300	6.079	7.87305	6.14891	6.81411
1301	8.104	9.27358	7.39812	6.54014
1302	8.505	9.39695	8.72413	8.54168
1303	12.128	10.8605	10.8548	11.1834
1304	12.773	10.3839	12.3229	13.1472
1305	9.32	8.44443	9.45035	10.2037
1306	8.963	8.33391	7.58703	8.80204
1307	7.904	8.36714	6.52451	7.70526
1308	5.831	6.96214	5.7078	5.55231
1309	5.306	7.15368	5.55443	5.2846
1310	4.423	3.59964	3.69248	3.64142
1311	3.414	5.09137	3.43387	3.2401
1312	5.913	4.21023	4.5811	5.33303
1313	6.328	4.59102	5.92549	7.42561
1314	8	4.90847	8.49667	7.25863
1315	7.9	6.28599	5.07293	7.81527
1316	8.729	9.77183	6.29323	7.68433
1317	8.519	10.3955	8.01402	9.41803
1318	14.276	12.7096	10.9761	13.7798
1319	17.611	13.7105	15.9574	16.7897
1320	26.662	27.1133	25.92	26.9893
1321	33.521	32.507	32.712	33.6365
1322	41.13	36.6942	36.4057	40.3321
1323	39.413	40.7622	40.237	39.045
1324	39.333	40.3854	39.4107	38.6836
1325	35.763	32.3228	34.1677	36.1895
1326	36.757	33.4553	33.1517	34.462
1327	31.052	33.7872	32.2535	31.305
1328	33.822	31.9134	32.3891	34.2597
1329	34.516	33.1855	33.7259	36.0631
1330	37.383	38.4352	36.973	37.808
1331	41.911	40.2569	39.7916	41.0135
1332	43.051	41.1558	40.6562	42.2051
1333	41.865	42.0261	41.5769	41.5051
1334	43.021	41.591	43.0592	42.999
1335	41.73	40.5212	39.018	41.5058
1336	41.913	42.3037	40.5753	41.4076
1337	43.759	42.9558	42.6193	43.6628
1338	43.284	43.679	43.6576	43.4454
1339	44.344	43.5925	45.4266	43.2898
1340	43.944	43.4913	42.6082	45.521
1341	43.491	43.7892	43.335	41.8892
1342	41.541	43.8641	42.2719	41.6373
1343	44.3	44.0448	42.6209	42.9986
1344	42.347	43.3836	44.8429	43.0929
1345	44.386	41.9755	44.9563	45.3198
1346	44.444	40.8155	43.5275	43.6746
1347	40.188	40.5022	39.6607	39.3105
1348	34.196	39.3023	37.9049	37.1353
1349	38.867	38.4361	39.0411	37.6454
1350	41.923	40.4246	40.0972	43.5834
1351	41.362	40.8509	41.3309	41.2861
1352	41.216	41.161	40.4724	40.1736
1353	41.437	42.252	40.8618	40.1572
1354	40.078	41.1986	40.8369	40.328
1355	42.473	39.343	39.9932	42.1816
1356	39.017	40.6202	40.2482	39.0053
1357	40.826	41.0351	39.6395	39.9726
1358	39.481	42.3134	40.3985	40.3943
1359	41.264	41.5025	42.9708	40.8027
1360	43.66	43.8532	43.6174	43.8156
1361	44.021	45.2559	45.1224	43.0372
1362	46.132	46.5994	44.9276	43.8755
1363	41.421	47.7383	45.5466	43.1535
1364	45.464	47.3067	46.9646	45.1048
1365	45.23	45.2616	45.5269	47.0761
1366	45.313	46.5904	46.8477	44.1665
1367	43.271	47.3569	46.7091	44.1276
1368	44.52	47.6466	47.9947	45.6354
1369	45.121	47.5512	49.2978	47.2192
1370	43.8	43.7882	44.5183	45.4492
1371	43.142	44.6348	44.4388	42.4295
1372	42.994	44.7182	43.0226	41.2638
1373	42.537	44.7507	44.2982	43.3437
1374	45.045	44.7773	47.8243	46.1812
1375	46.757	44.2026	45.5794	47.0139
1376	43.943	44.5293	45.8971	44.0993
1377	41.837	44.9165	44.0546	42.1438
1378	40.282	44.5302	44.0106	41.9984
1379	40.143	43.6353	44.9576	42.2855
1380	40.3	40.5033	41.9305	42.5103
1381	39.833	40.154	41.5876	40.0844
1382	37.901	39.9988	39.6403	38.1077
1383	35.988	39.3189	39.3411	37.5894
1384	36.195	38.5382	39.6041	37.8808
1385	35.41	36.5487	37.016	37.2257
1386	36.586	36.802	37.7027	36.5274
1387	37.268	36.6304	36.8756	37.2586
1388	34.404	36.85	37.2989	35.1726
1389	33.728	36.2346	36.8164	34.8607
1390	32.856	33.6664	32.6089	34.4087
1391	33.683	34.7241	33.7569	33.5741
1392	35.025	34.8708	34.4229	34.8732
1393	35.835	35.5164	35.8988	34.9875
1394	36.739	35.0742	37.3346	36.0435
1395	36.367	32.9213	33.3192	36.9807
1396	31.915	32.613	32.6044	32.7773
1397	32.119	32.6019	31.1908	31.4877
1398	31.566	31.384	31.2087	31.1877
1399	30.043	30.5634	32.2909	31.1266
1400	29.209	27.5734	27.1506	30.1032
1401	25.336	26.9571	26.2368	26.1456
1402	25.958	25.994	24.9096	25.6067
1403	26.286	24.7483	24.8474	26.185
1404	23.702	23.6389	25.478	25.2415
1405	21.136	19.6738	19.6012	22.0119
1406	18.887	18.9669	17.672	19.2965
1407	17.215	17.4216	15.6181	16.3315
1408	15.9	16.1988	15.2655	16.7912
1409	18.144	15.2561	17.1173	18.0971
1410	18.647	16.7648	16.3815	19.5808
1411	17.813	16.5712	16.3942	17.9337
1412	17.742	16.328	15.6016	16.9811
1413	18.168	16.1865	15.322	16.5323
1414	14.325	14.5626	14.1907	15.8876
1415	10.781	9.343	9.62725	10.7896
1416	9.298	8.55844	7.82034	9.38166
1417	8.72	7.22232	6.63949	8.59288
1418	7.02	5.9695	6.20346	7.32315
1419	6.321	5.24365	6.21816	6.6492
1420	5.723	5.08698	5.09053	5.88384
1421	6.144	4.70961	4.48032	5.68777
1422	4.342	3.75344	3.6073	4.20394
1423	4.452	3.21094	3.16428	3.25544
1424	3.6	2.29295	2.34558	3.39772
1425	2.002	0.201491	0.58972	1.88241
1426	1.005	0.526314	0	0.234785
1427	0.907	0	0	0.311765
1428	0.544	0	0	0
1429	0.268	0	0	0
1430	0.421	0	0	0.441214
1431	0.113	0	0	0
1432	0.056	0	0	0
1433	0	0	0	0
1434	0	0	0	0
1435	0	0	0	0.126334
1436	0	0	0	0
1437	0.169	0	0	0.336862
1438	0.521	0.313434	0	0.884271
1439	0.94	0.865291	0	0.705985
1440	1.954	0.521888	0.535649	2.42059
1441	1.086	3.02866	0.925583	0.879608
1442	2.139	3.54685	1.74812	2.02493
1443	4.814	5.3036	4.09624	5.38749
1444	11.648	6.45872	10.2738	9.53353
1445	15.53	11.8784	11.4681	12.8515
1446	14.133	16.748	14.3982	13.1448
1447	12.622	18.8778	16.7793	14.6363
1448	21.861	22.72	21.6356	23.5869
1449	37.58	23.9368	31.5991	31.4618
1450	33.834	31.8875	33.3551	34.8663
1451	37.532	35.1491	36.2343	35.3536
1452	38.929	38.5748	37.097	38.3698
1453	41.432	40.072	37.9735	38.4319
1454	35.105	39.7319	38.293	37.1576
1455	36.081	35.362	33.9043	35.6335
1456	35.967	38.1377	37.0695	37.1258
1457	38.851	38.4887	39.4577	38.8814
1458	39.338	39.0408	41.3043	41
1459	40.153	39.8801	42.0972	42.7004
1460	42.65	40.6127	41.3762	43.6478
1461	40.999	41.4128	42.2225	42.1756
1462	41.31	41.7443	40.8731	41.0674
1463	40.306	41.5166	40.7791	41.2612
1464	40.892	41.3401	42.8174	41.6855
1465	42.756	42.2123	41.7254	44.7312
1466	43.74	42.1973	42.9162	42.8437
1467	40.483	42.7712	41.9168	41.5294
1468	40.325	42.6127	41.7331	40.2017
1469	39.461	41.8152	41.3548	40.1369
1470	37.225	39.0261	36.8473	39.671
1471	38.308	39.5438	38.0251	36.8275
1472	37.131	39.2838	37.8548	37.3387
1473	39.152	40.3694	39.0895	38.2819
1474	38.934	39.6631	40.3681	39.3365
1475	37.195	37.4783	37.2778	37.4602
1476	36.872	36.9585	37.3268	36.2957
1477	35.89	37.2219	35.8036	36.7524
1478	34.678	37.6076	35.4196	34.6444
1479	32.502	36.3826	36.2122	33.1646
1480	35.305	37.0833	34.3038	36.6765
1481	37.734	37.951	36.5942	36.9012
1482	37.667	38.758	37.8707	37.6506
1483	37.56	40.1051	38.9492	37.7635
1484	37.316	39.1378	39.4797	38.1354
1485	39.956	35.4343	37.6411	39.8748
1486	36.343	34.9876	35.8421	35.7157
1487	30.381	34.8297	33.0367	31.5932
1488	29.679	33.8324	32.5052	31.2821
1489	37.966	33.0243	35.8218	34.5972
1490	38.322	35.5709	38.8234	39.7281
1491	35.27	33.897	37.6614	37.0797
1492	36.034	34.4841	33.9696	34.6597
1493	28.318	32.487	31.6387	29.098
1494	27.87	30.7668	29.5007	27.4446
1495	29.289	28.4664	31.2763	31.8526
1496	31.379	27.7483	30.9891	31.0415
1497	26.555	27.1402	28.4952	27.5213
1498	25.664	25.8844	27.1929	23.9511
1499	18.95	24.6409	21.4313	21.4384
1500	17.721	15.2536	17.2941	17.1558
1501	13.615	14.2697	14.6482	14.4173
1502	11.752	12.1531	11.8322	11.1418
1503	9.932	11.4003	11.6591	11.9107
1504	11.11	10.9029	13.882	12.2025
1505	11.015	13.6568	11.1254	12.0573
1506	12.288	15.049	14.0856	13.3796
1507	15.658	15.6923	15.9211	15.5919
1508	15.69	17.8259	18.3645	16.7057
1509	16.384	16.6784	19.8111	17.3087
1510	15.228	13.8027	15.5044	17.3025
1511	14.028	13.9994	14.9559	14.8319
1512	14.32	14.2095	14.1284	14.2763
1513	13.223	13.6003	13.7026	12.8089
1514	8.87	13.1035	11.7748	11.0859
1515	8.253	6.1287	7.57156	8.14292
1516	5.639	4.77562	4.52944	5.10456
1517	2.97	2.85082	2.54306	2.04025
1518	1.428	0.590021	1.12157	0.619745
1519	0.406	0.610939	1.47355	0.791349
1520	0	0	0	0.722779
1521	0	0.551351	0	0
1522	0.309	0	0	0
1523	0.648	0	0	0
1524	1.706	0	0	0.0458976
1525	0.641	0	0	0
1526	0	0	0	0
1527	0	0	0	0
1528	0	0	0	0
1529	0	0	0	0
1530	0	0	0	0
1531	0	0	0	0
1532	0	0	0	0
1533	0.295	0	0	0
1534	3.432	0	0	1.08119
1535	4.222	1.78016	2.04116	4.29616
1536	4.989	3.75938	2.6219	4.42563
1537	5.118	4.47318	3.448	4.8857
1538	7.231	5.63203	4.60078	6.58674
1539	9.734	6.37711	6.47868	8.30506
1540	11.075	7.29256	6.91876	10.1321
1541	9.848	9.98786	7.76178	8.6154
1542	9.326	11.0206	8.86269	8.86203
1543	13.39	12.4633	11.4085	13.4061
1544	18.085	13.4872	17.0228	16.7734
1545	18.431	17.4128	15.0687	18.7355
1546	20.061	21.7043	18.6561	18.5162
1547	21.109	23.4776	21.1194	20.8803
1548	27.884	26.7687	25.9214	27.5583
1549	33.144	27.5523	33.6296	33.9622
1550	35.333	33.0562	31.7378	35.7224
1551	35.393	36.8109	35.876	35.6105
1552	37.815	39.2104	37.7536	37.9121
1553	40.929	41.3856	40.6007	41.8551
1554	42.316	41.5455	44.5493	44.7416
1555	42.713	42.4247	43.9907	45.1501
1556	46.964	43.5357	45.8088	46.8439
1557	43.977	44.6798	44.4636	44.9781
1558	43.456	44.117	43.8861	44.8032
1559	40.267	44.3525	42.7576	44.0019
1560	42.806	41.7193	41.2047	43.4718
1561	40.92	42.0636	42.88	42.8552
1562	43.169	41.9366	42.1338	43.9027
1563	41.548	41.7918	42.8853	43.1486
1564	39.259	41.843	43.5694	41.4843
1565	41.226	41.572	39.1757	42.7671
1566	38.48	42.9687	40.8809	38.6369
1567	37.777	43.172	41.7581	39.6488
1568	43.516	44.7886	44.0746	43.94
1569	45.742	44.2226	49.7273	46.2681
1570	45.438	45.9465	45.4972	47.3628
1571	45.757	46.4798	46.8992	45.4654
1572	47.09	47.7573	46.4096	47.5912
1573	46.304	48.7766	46.5167	46.3106
1574	44.552	47.4396	47.1653	44.7403
1575	41.845	45.1034	41.9558	43.9845
1576	45.209	46.2457	44.4826	44.1687
1577	47.268	46.6842	46.1859	47.8486
1578	47.679	48.0905	48.0435	47.1193
1579	47.046	47.5462	48.8893	47.007
1580	47.003	46.0983	46.1501	47.8297
1581	47.103	46.7795	46.5257	45.4818
1582	46.569	47.1793	46.078	45.6537
1583	45.385	47.3859	46.3616	45.8254
1584	45.889	46.7283	48.0048	45.8207
1585	44.22	44.6337	43.3389	44.9952
1586	42.794	45.4824	44.7755	42.421
1587	43.874	45.7426	45.445	43.3836
1588	46.873	46.2356	46.869	45.3393
1589	47.556	45.4394	49.1614	47.2943
1590	47.555	45.8246	48.38	48.5311
1591	47.146	45.8828	47.3766	46.9759
1592	45.344	46.0799	44.4899	44.6693
1593	39.036	45.1898	43.1023	41.0494
1594	43.254	43.881	43.3838	40.986
1595	44.318	41.1097	43.4641	46.2085
1596	42.601	40.3302	42.0858	40.9936
1597	30.937	39.5143	38.0609	32.8695
1598	37.842	38.439	37.7052	36.574
1599	39.112	37.2943	40.4572	42.1092
1600	40.81	39.315	41.755	41.0483
1601	42.26	39.3754	42.0849	40.4863
1602	39.862	39.5398	40.4667	38.5439
1603	39.991	39.2638	39.4727	36.874
1604	33.221	37.4069	36.4379	33.8352
1605	28.558	29.3707	28.6396	28.3809
1606	30.955	28.9062	27.8765	28.7635
1607	24.159	27.3853	26.783	24.5117
1608	26.198	26.5846	27.537	26.2062
1609	28.036	26.0206	28.9441	26.637
1610	28.112	29.5691	27.2123	29.4287
1611	28.419	29.7835	28.6657	26.8814
1612	28.132	29.9236	28.5801	26.4895
1613	34.682	29.8567	29.6519	29.5127
1614	26.294	28.127	30.4901	29.2269
1615	30.106	18.6226	22.5102	29.3905
1616	12.712	14.8029	15.3522	15.3711
1617	8.938	11.7983	11.7168	6.32057
1618	7.281	6.5648	6.66633	7.03077
1619	5.274	5.69326	5.21519	4.9771
1620	4.63	6.97138	3.4758	6.59229
1621	4.845	5.92742	3.00695	4.49011
1622	4.382	3.83827	1.57749	2.82886
1623	3.32	3.42704	1.52779	3.79814
1624	3.472	2.68718	0.996469	2.63344
1625	2.459	0	0.186675	3.46707
1626	1.631	1.56023	0	1.24097
1627	0.452	0.866509	0	0.746073
1628	1.687	2.34313	0	1.37089
1629	3.671	2.54774	0	1.06067
1630	3.691	6.34926	1.2766	4.20929
1631	7.811	10.863	6.07914	6.04527
1632	12.106	12.4969	10.3025	11.7084
1633	18.468	17.1	16.0387	19.1286
1634	23.03	17.8383	23.0632	24.4569
1635	25.571	18.1281	21.0519	23.0959
1636	20.199	21.1292	20.4533	20.9952
1637	19.733	23.0575	20.1958	21.4551
1638	21.193	23.5867	21.9863	23.4999
1639	32.627	24.9478	29.9705	30.0532
1640	42.198	35.3816	37.5513	41.7242
1641	40.594	39.487	40.084	40.6774
1642	42.752	42.3817	41.3006	42.158
1643	45.735	43.9387	42.2023	43.6505
1644	44.226	43.3659	43.959	45.062
1645	43.927	39.5198	42.3232	43.1668
1646	44.248	41.5816	42.1289	41.8796
1647	41.131	41.7954	41.9899	41.7511
1648	41.299	40.6901	41.7756	41.8017
1649	42.026	41.271	42.1486	41.8575
1650	43.618	42.0344	39.8647	44.0338
1651	41.5	42.6737	41.2909	41.4369
1652	42.497	42.9836	41.7557	41.4051
1653	44.772	42.949	42.8094	42.9066
1654	44.476	42.8531	45.7894	45.168
1655	42.79	42.8605	41.8546	43.8079
1656	44.391	43.5101	43.3163	43.4845
1657	43.476	44.2983	43.8908	44.9722
1658	43.689	44.6141	44.1463	44.2438
1659	40.984	43.9669	44.8745	43.2857
1660	38.017	41.0786	39.0431	40.2679
1661	39.612	41.819	40.7757	41.2147
1662	44.24	42.1033	41.1387	43.1762
1663	42.002	43.6442	42.4197	42.1944
1664	43.51	43.5434	43.4869	43.3176
1665	43.97	44.6155	43.3467	44.5255
1666	46.474	46.1596	45.5754	44.2813
1667	46.601	47.1099	46.4795	47.6906
1668	45.965	48.8266	47.5473	46.236
1669	45.11	48.1331	48.7197	44.7828
1670	44.024	44.0129	43.4093	45.9585
1671	41.966	44.0893	43.0509	42.2054
1672	41.386	44.3634	42.1445	41.3829
1673	41.767	44.0504	42.5888	42.7292
1674	43.894	43.7274	45.5835	44.4792
1675	46.216	45.5727	45.4807	46.292
1676	47.228	46.4727	46.6845	45.8419
1677	47.052	46.8157	46.6484	46.8044
1678	44.513	47.0711	46.3719	44.3826
1679	43.543	45.8878	45.2665	42.9122
1680	41.198	41.6716	42.575	42.722
1681	40.506	40.8292	42.1273	42.5581
1682	44.254	40.5777	40.2808	42.5315
1683	37.427	39.1172	38.971	37.8454
1684	35.371	37.9617	35.6168	34.9795
1685	41.431	39.8946	43.1516	42.4851
1686	44.012	38.5346	43.3395	43.4126
1687	39.485	38.4048	40.2293	40.5497
1688	34.26	36.586	37.2251	33.6464
1689	24.847	34.5186	28.3489	27.6787
1690	18.222	16.5835	18.7663	17.7331
1691	10.566	13.1908	13.3156	11.4026
1692	7.185	8.98361	8.96496	7.17283
1693	4.257	5.81725	7.27497	6.39611
1694	7.515	5.84226	10.2697	6.60773
1695	5.799	10.3471	7.20164	6.52418
1696	7.953	11.4918	10.0074	7.47281
1697	9.456	10.7972	10.6355	9.65209
1698	11.576	13.4303	13.2186	10.9466
1699	9.747	11.7255	15.9201	11.5488
1700	11.151	8.87352	11.6711	11.672
1701	11.245	10.5663	11.7023	10.0185
1702	9.594	11.0805	11.7775	8.74585
1703	10.912	12.7718	12.9175	10.1838
1704	12.963	12.4857	14.8617	12.7021
1705	12.563	11.5445	10.5421	13.04
1706	10.405	13.1411	11.0653	11.0914
1707	14.459	13.5199	12.5086	13.1671
1708	16.907	14.0527	14.326	15.0736
1709	14.959	14.5391	16.6415	16.5778
1710	17.506	12.5754	14.4253	18.2219
1711	13.305	12.9599	12.6518	14.4651
1712	13.239	12.7546	11.9293	12.483
1713	11.443	10.6272	10.9111	11.2427
1714	11.279	10.7273	9.1675	10.049
1715	11.702	11.5438	11.0254	12.5335
1716	14.952	11.7671	10.4829	14.4166
1717	14.235	11.4137	9.86312	12.142
1718	11.772	9.99702	8.66282	9.96396
1719	7.743	9.74772	4.84201	8.48952
1720	5.262	3.30725	3.51934	5.81144
1721	3.54	3.09844	1.75501	3.41657
1722	2.088	1.41596	0.315814	1.30401
1723	2.093	0.383785	0.149724	1.21153
1724	1.802	0.71312	0.149373	1.80728
1725	1.434	1.34289	0	2.26585
1726	2.105	1.93479	0	1.56166
1727	1.698	1.59362	0.112096	0.831888
1728	3.181	2.65855	1.17915	3.5792
1729	3.078	2.74766	2.87658	5.36062
1730	3.941	2.69051	3.29557	3.923
1731	4.722	3.6829	4.04147	5.46171
1732	4.592	4.07166	4.35993	6.42058
1733	3.404	5.02997	4.74776	5.42761
1734	3.413	5.18602	4.88925	4.58405
1735	6.51	4.59971	4.98614	6.75845
1736	5.413	6.04385	4.88321	5.08376
1737	7.291	6.4331	5.33906	6.4994
1738	6.826	7.68293	6.55953	7.87289
1739	9.692	8.46133	10.1239	8.24442
1740	10.833	11.1754	9.71419	11.9286
1741	9.819	13.7734	11.9012	10.4294
1742	13.017	14.946	13.8813	14.2568
1743	15.153	16.6028	16.7802	16.9792
1744	20.098	17.3381	21.2612	20.438
1745	22.139	17.9251	21.542	23.6063
1746	15.622	18.2097	19.7439	17.8357
1747	16.975	18.9976	17.2442	18.1981
1748	16.976	17.5607	16.2698	17.477
1749	15.934	17.7076	17.9688	16.5804
1750	17.059	16.9366	15.8493	17.1227
1751	16.766	18.3038	17.0922	16.2548
1752	17.202	18.4246	18.0487	17.7194
1753	20.679	19.4413	20.4244	21.2631
1754	23.128	19.9611	25.222	24.1728
1755	22.241	22.9964	20.1488	21.2316
1756	21.3	26.6304	23.8131	21.7067
1757	30.094	28.5008	27.968	28.2708
1758	34.643	32.1034	31.8154	34.2041
1759	36.044	32.3735	36.5642	35.8665
1760	31.302	33.7172	30.1136	31.1073
1761	33.721	36.502	34.1439	32.8583
1762	40.979	38.7388	37.4429	40.014
1763	41.544	40.841	41.1992	41.497
1764	42.806	41.1308	45.5465	42.2303
1765	46.366	43.3927	43.8704	45.8479
1766	45.768	44.5143	45.6238	44.6596
1767	45.358	45.7144	45.4411	44.8775
1768	46.114	45.4296	45.9568	45.3675
1769	44.235	45.2693	46.6874	47.2444
1770	45.927	44.1163	45.8571	46.5209
1771	43.687	43.5973	45.7249	43.7272
1772	44.367	43.2861	44.3402	44.6271
1773	41.214	41.6766	42.8934	41.4166
1774	37.34	40.9128	40.9055	38.9142
1775	35.787	39.2414	36.4887	38.0015
1776	38.745	39.062	37.5693	37.5442
1777	38.293	38.0848	37.8279	36.8911
1778	36.397	37.6382	37.9069	34.8066
1779	37.479	36.7802	36.0686	36.1781
1780	34.319	33.4401	34.1228	35.7997
1781	33.491	31.0222	32.5655	33.011
1782	31.277	30.2261	29.2238	31.1737
1783	28.228	28.3044	26.3491	25.9297
1784	19.927	25.8924	21.3109	21.0739
1785	12.877	15.5943	13.3573	13.4217
1786	10.414	13.1212	11.0093	12.2223
1787	11.672	10.1655	9.11051	11.2897
1788	7.467	9.12871	8.3839	8.88896
1789	9.497	8.47106	10.2834	9.11055
1790	10.919	9.78843	8.92373	10.4965
1791	8.122	10.3387	9.99738	9.70103
1792	11.75	9.5732	9.65432	10.6861
1793	11.382	11.7098	10.2573	10.2016
1794	10.238	10.1129	10.2558	8.73484
1795	11.995	8.72752	9.28308	11.2993
1796	8.325	9.85871	9.23645	8.44185
1797	10.299	10.3352	9.6363	9.57452
1798	11.796	11.8022	10.7709	10.3218
1799	12.503	10.8136	12.4296	11.6174
